# Supplementary material
Source: ML conference proceedings conference paper supplement (https://proceedings.mlr.press/v164/li22c.html)
Supplement: Supplementary file 3 [file li22c-supp.zip]

Archive with 2 entries (2 files):
- CoRL_2021_sup_mat.pdf
- __MACOSX/._CoRL_2021_sup_mat.pdf
